# Supplementary material for: Upregulated function of mitochondria-associated ER membranes in Alzheimer disease
Source: PubMed Central journal article supplement — EMBO J. 2012 Aug 14;31(21):4106–23. doi: 10.1038/emboj.2012.202 (PMC3492725; doi:10.1038/emboj.2012.202), 2012-08-14
Supplement: emboj2012202s1.pdf [file emboj2012202s1.pdf]

**Table S1. Description of cell lines used in this work**

| Cell line  | Cell type  | Source           | Phenotype                | Age | Sex | <sup>3</sup> H-Chol | LipidTox | Oil Red O | <sup>3</sup> H-Ser | Cin/Dura | FL-SA-Ro | EM | Co-loc |
|------------|------------|------------------|--------------------------|-----|-----|---------------------|----------|-----------|--------------------|----------|----------|----|--------|
| ORH        | Fibroblast | This work        | Control                  | 36  | M   | 2                   | 1        |           | >3                 | >3       | 1        | 1  | 4      |
| LUI        | Fibroblast | This work        | Control                  | 31  | M   |                     |          |           | >3                 | 1        |          |    |        |
| ESP        | Fibroblast | This work        | Control                  | 31  | F   | 1                   | 1        |           | 1                  | 1        | 1        |    | 1      |
| AG07871    | Fibroblast | Coriell          | Control                  | 49  | F   | 1                   | 1        |           | 1                  |          | 1        |    |        |
| AG08379    | Fibroblast | Coriell          | Control                  | 60  | F   | 1                   | 2        |           | 1                  | 1        |          |    |        |
| AG08509    | Fibroblast | Coriell          | Control                  | 73  | M   | 2                   | 4        |           | 1                  |          |          |    | 5      |
| AG08517    | Fibroblast | Coriell          | Control                  | 66  | F   |                     | 1        | 1         | 1                  | 1        | 1        |    |        |
| AG08525    | Fibroblast | Coriell          | Control                  | 82  | F   |                     |          |           |                    | 1        |          |    |        |
| SW7        | Fibroblast | Richard Cowburn  | Control                  | 59  | M   |                     | 1        |           |                    |          |          |    |        |
| AG06840    | Fibroblast | Coriell          | FAD-PS1(A246E)           | 52  | M   | 1                   | 4        |           | 3                  | 1        | 1        | 1  |        |
| AG06848    | Fibroblast | Coriell          | FAD-PS1(A246E)           | <49 | F   | 1                   | 1        | 1         | 2                  | 1        | 1        |    |        |
| EB         | Fibroblast | Tom Bird         | FAD-PS1(G209V)           | 41  | F   | 1                   | 1        | 1         | 1                  | 1        | 1        |    |        |
| GG3        | Fibroblast | Gary Gibson      | FAD-PS1(M146L)           | 18  | M   | 1                   | 1        |           | 2                  | 1        |          |    | 5      |
| WA         | Fibroblast | Tom Bird         | FAD-PS1(L418F)           | 33  | M   | 1                   | 1        |           | 1                  | 1        | 1        |    |        |
| DD         | Fibroblast | Tom Bird         | FAD-PS2(N141I)           | 48  | M   |                     | 1        |           | 2                  |          | 1        |    |        |
| SW5        | Fibroblast | Richard Cowburn  | FAD-APPswe (K670N/M671L) | 58  | F   |                     |          |           |                    | 1        |          |    |        |
| SW6        | Fibroblast | Richard Cowburn  | FAD-APPswe (K670N/M671L) | 64  | M   |                     | 1        |           |                    | 1        |          |    | 1      |
| A51486     | Fibroblast | Tom Bird         | SAD                      | ?   | ?   | 1                   | 1        |           | 1                  | 1        |          |    | 6      |
| AG05770    | Fibroblast | Coriell          | SAD                      | <62 | M   | 1                   | 1        |           | 1                  |          |          |    | 4      |
| AG06263    | Fibroblast | Coriell          | SAD                      | <60 | F   | 1                   | 4        |           | 1                  | 2        | 1        | 1  |        |
| AG06869    | Fibroblast | Coriell          | SAD                      | 59  | F   | 1                   | 2        |           | 1                  | 2        | 1        |    |        |
| AG07374    | Fibroblast | Coriell          | SAD                      | 73  | M   | 1                   | 1        |           | 1                  | 1        |          |    |        |
| AG07375    | Fibroblast | Coriell          | SAD                      | <62 | M   | 1                   | 1        |           | 1                  | 1        |          |    | 1      |
| AG08243    | Fibroblast | Coriell          | SAD                      | 72  | M   | 1                   | 1        |           | 1                  | 1        |          |    | 3      |
| AG08259    | Fibroblast | Coriell          | SAD                      | 87  | M   | 1                   | 1        |           | 1                  | 1        |          |    | 4      |
| AG21158    | Fibroblast | Coriell          | SAD                      | 69  | F   | 1                   | 2        |           | 1                  | 1        | 1        |    |        |
| Ps-WT      | MEF        | Bart De Strooper | Wild-type control        | NA  | NA  | >3                  | >3       | 1         | >3                 | >3       | 1        | 1  | >3     |
| Ps1-KO     | MEF        | Bart De Strooper | Ps1-KO                   | NA  | NA  | >3                  | >3       | 1         | >3                 | 3        | 1        |    | >3     |
| Ps2-KO     | MEF        | Bart De Strooper | Ps2-KO                   | NA  | NA  | >3                  | >3       | 1         | >3                 | 3        | 1        |    | >3     |
| DKO        | MEF        | Bart De Strooper | Ps1+Ps2 double KO        | NA  | NA  | >3                  | >3       | 1         | >3                 | >3       | 1        | 1  | >3     |
| M3         | MEF        | This work        | PS1-KD control           | NA  | NA  | 3                   | >3       | 1         | >3                 | 3        | 1        |    |        |
| M2x2       | MEF        | This work        | PS1-KD                   | NA  | NA  | 3                   | >3       | 1         | >3                 | 3        | 1        |    |        |
| M2x2+WT    | MEF        | This work        | Ps1-KD + Human WT-PS1    | NA  | NA  |                     | >3       | 1         | 3                  | 1        | 1        |    |        |
| M2x2+A246E | MEF        | This work        | Ps1-KD + Human A246E-PS1 | NA  | NA  |                     | >3       | 1         | 3                  | 1        | 1        |    |        |
| 510        | MEF        | David Chan       | Wild-type control        | NA  | NA  | 1                   | >3       |           | 3                  |          |          |    |        |
| 511        | MEF        | David Chan       | Mfn2-KO                  | NA  | NA  | 1                   | >3       |           | 3                  |          |          |    |        |
| 516        | MEF        | David Chan       | Mfn2-KO                  | NA  | NA  |                     | >3       |           |                    |          |          |    |        |
| 518        | MEF        | David Chan       | Wild-type control        | NA  | NA  |                     | >3       |           |                    |          |          |    |        |

See text for description of the various experiments. Numbers denote the number of times the indicated cell was used in any particular experiment. NA, not applicable.

**Fig. S1**

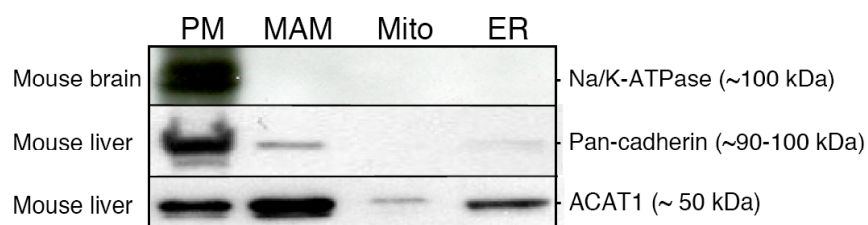

**Figure S1.** Western blot to detect the indicated proteins in standard subcellular fractionation of mouse tissues to isolate PM, MAM, mitochondria, and ER fractions. Na/K-ATPase and pan-cadherin are enriched in the PM; ACAT is enriched in the MAM. Note that the MAM fraction is essentially devoid of the PM marker.

**Fig. S2**

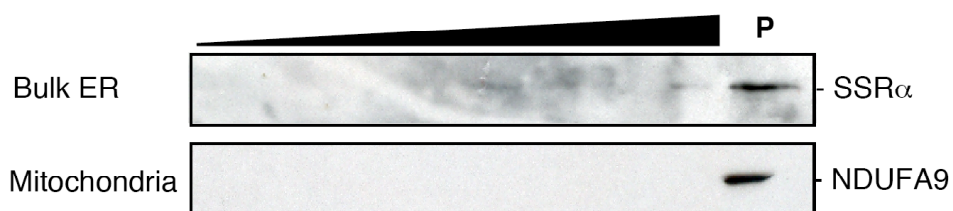

**Figure S2.** Western blot to detect SSR $\alpha$  (signal sequence receptor  $\alpha$ ; a marker for bulk ER) and NDUFA9 (a subunit of complex I of the respiratory chain; a marker for mitochondria) in fractions from a 5%-30% sucrose gradient (triangle denotes increasing density from left to right) of purified bulk ER and mitochondria after treatment with 1% Triton X-100 at 4°C for 1 h. Note that neither bulk ER nor mitochondria contain low density DRM's; almost all of both fractions, as determined by the marker proteins, was in the detergent-soluble pellet (P).

Fig. S3

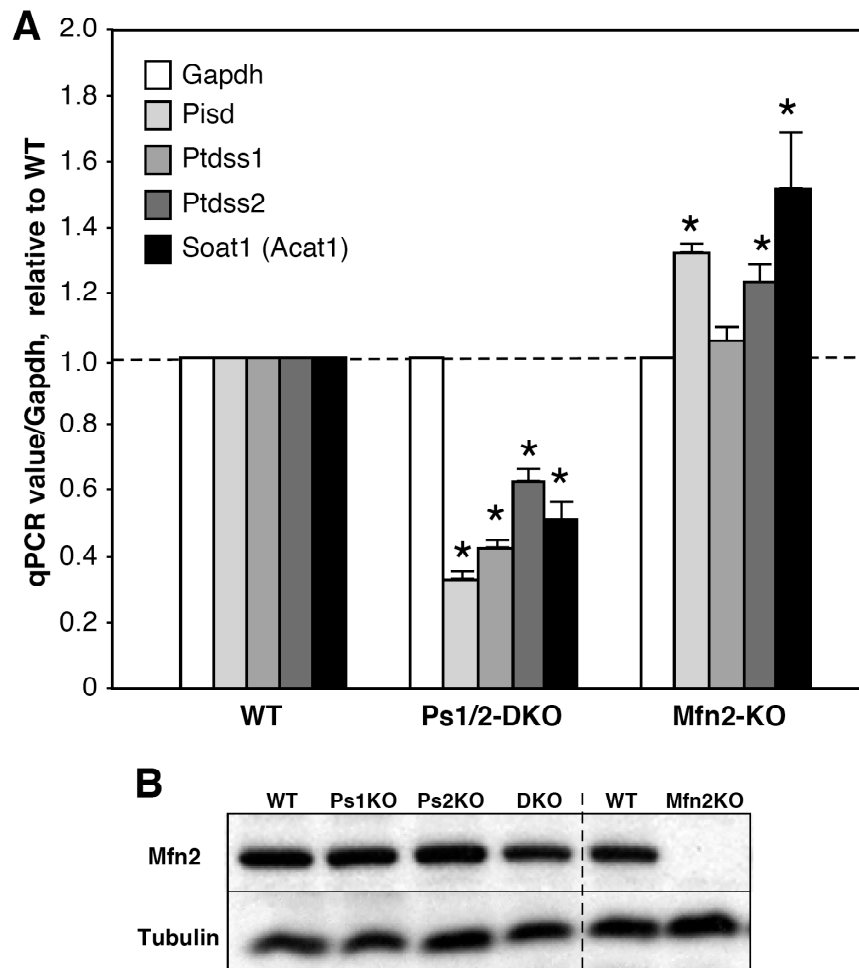

**Figure S3.** (A) Quantitative PCR of phospholipid-related mRNAs in Ps1/2 DKO and Mfn2-KO MEFs. Phosphatidylserine synthase-1 (*Ptdss1*) and -2 (*Ptdss2*) are MAM-localized proteins involved in the interconversion of PtdSer with PtdCho and PtdEtn, respectively; phosphatidylserine decarboxylase (*Pisd*) is a mitochondrial matrix protein that converts PtdSer to PtdEtn; acyl-CoA:cholesterol acyltransferase (*Acat1*, gene *Soat1* [sterol O-acyltransferase 1]), is a MAM-localized protein that converts free cholesterol to cholesteryl esters. All data were normalized to the qRT-PCR for *Gapdh*. (B) Western blot to detect Mfn2 in Ps-KO MEFs. Note that ablation of presenilins has little or no effect on Mfn2 expression.

**Fig. S4**

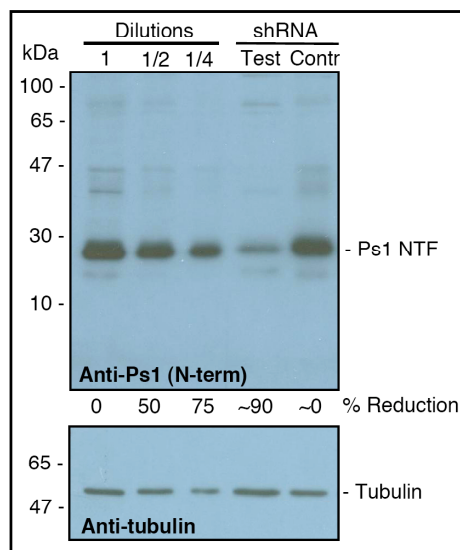

**Figure S4.** Characterization of Ps1-KD MEFs. Western blot analysis of shRNA clones. Lanes 1-3, dilutions to quantitate Ps1; lane 4, knockdown of Ps1 compared to mismatch control in lane 5. Anti-tubulin loading controls at bottom. The specificity of the shRNA primer was confirmed by transducing a mismatched shRNA. NTF, N-terminal fragment.

**Fig. S5**

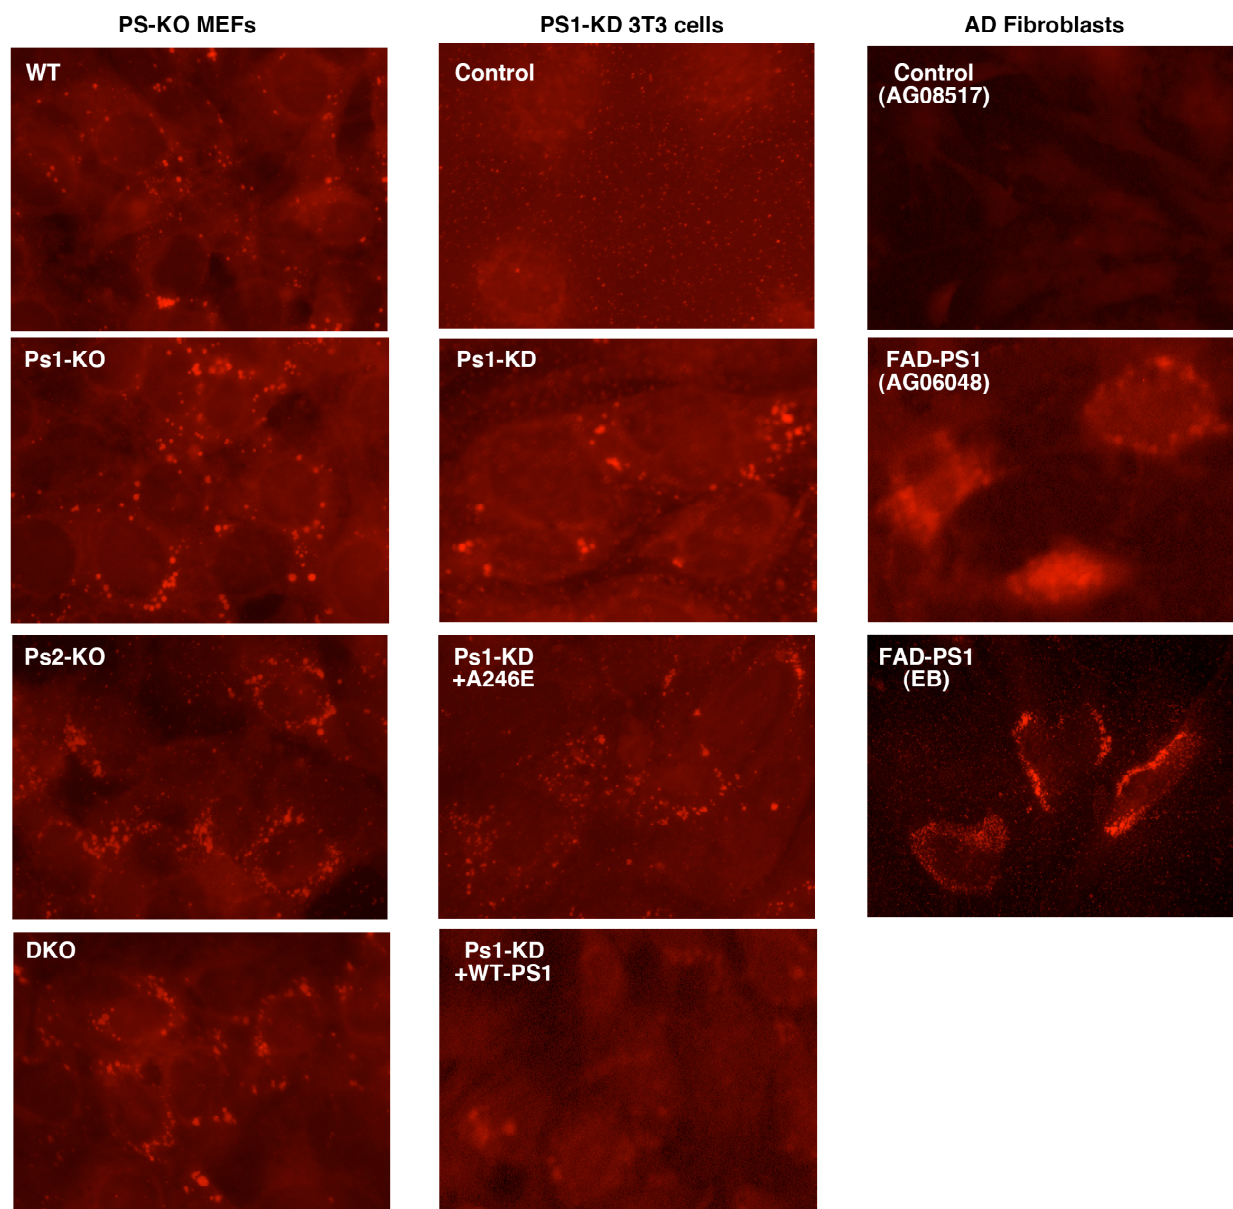

**Figure S5.** Examples of Oil Red O staining of the indicated cells. Note that the increase in punctate staining in the mouse PS1-KD MEFs was rescued by overexpression of human WT-PS1 but not by A246E mutant PS1.

**Fig. S6**

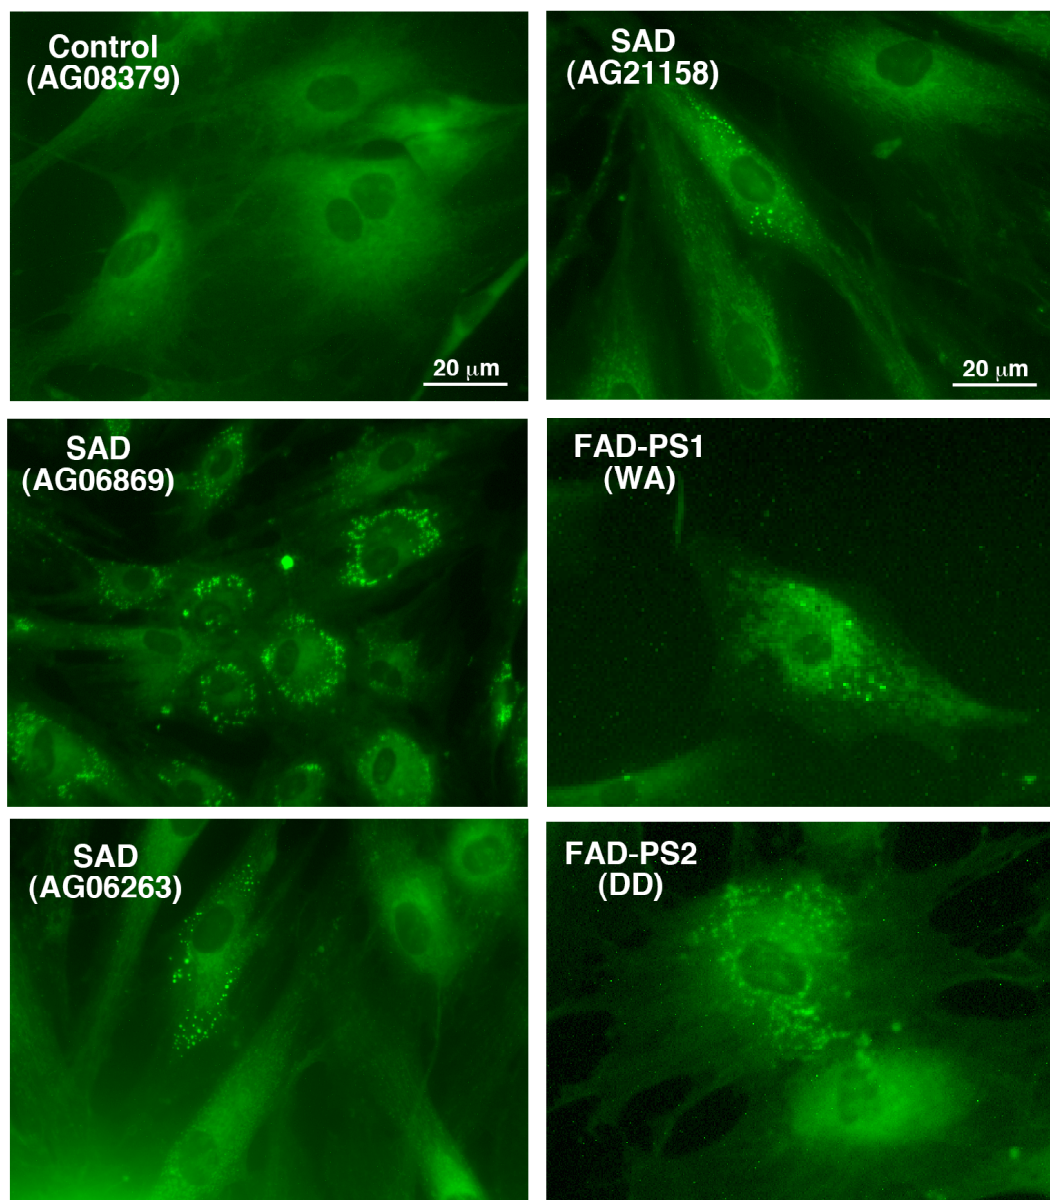

**Figure S6.** Examples of LipidTox staining of the indicated fibroblasts.



Fig. S7

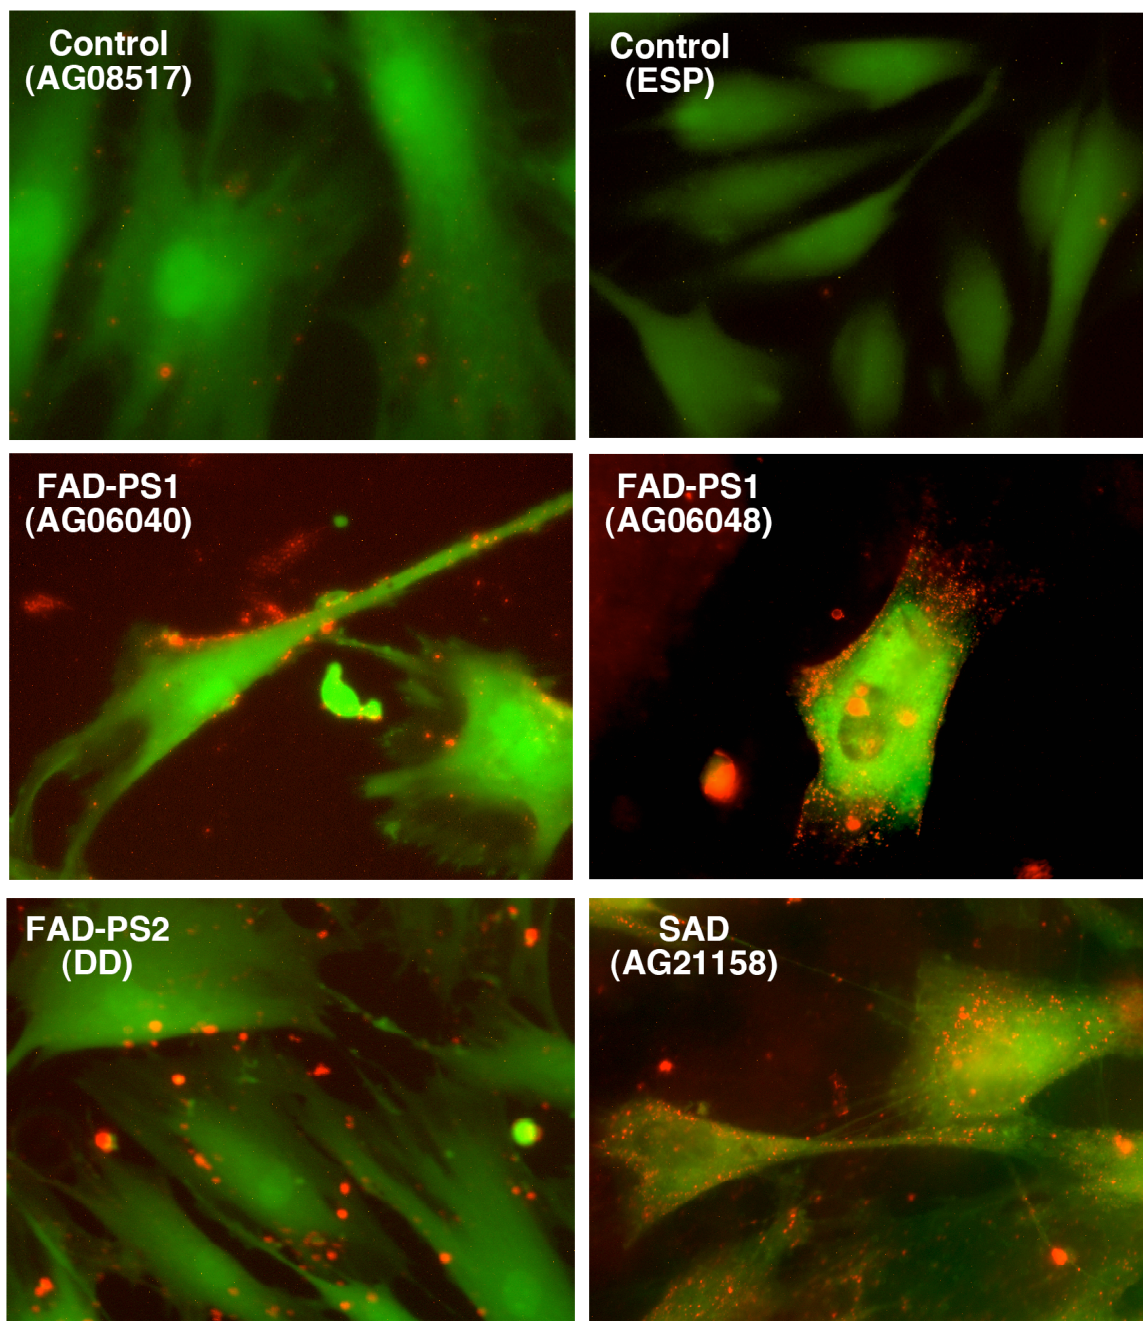

**Figure S7.** Examples of staining of AD fibroblasts with fluorescent cinnamycin (FL-SA-Ro). To visualize overall cell morphology, cells were counterstained with calcein.

Fig. S8

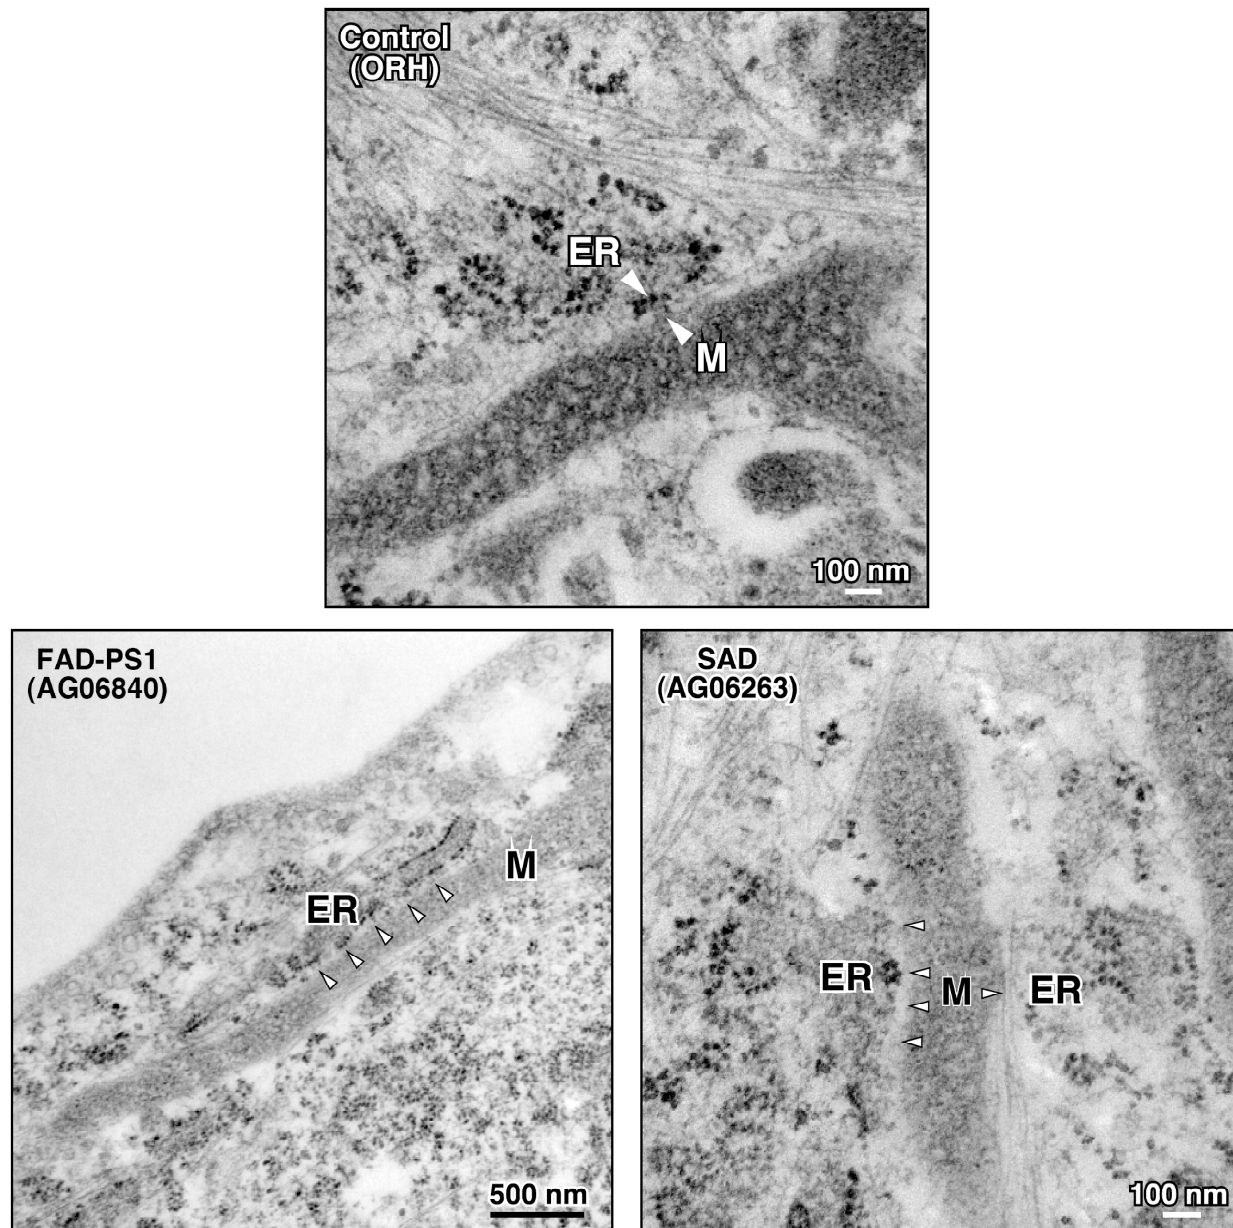

**Figure S8.** Representative electron micrographs of ER apposed to mitochondria (M) (i.e. MAM) in fibroblasts from a control subject, an FAD patient, and an SAD patient. Note the unusually large area of apposition in the FAD patient, extending for more than 1000 nm (arrowheads).



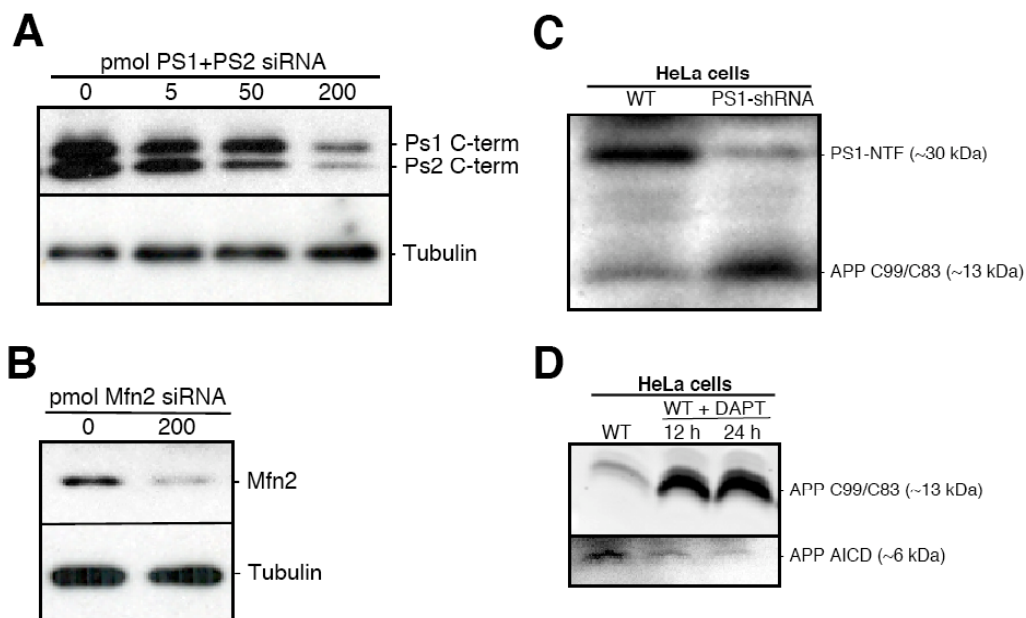

**Figure S9.** Western blot analysis of shRNA knockdown constructs and of DAPT-treated cells. **(A)** Co-transfection of mouse *Ps1* and *Ps2* shRNAs into WT- and Mfn2-mutant MEFs. Expression using 200 pmol was reduced ~80%. **(B)** Transfection of mouse *Mfn2* shRNA into WT- and Ps-mutant MEFs. Expression was reduced ~80%. **(C)** Transfection of a PS1 shRNA construct into HeLa cells. Expression was reduced ~70%, with a concomitant increase in the unprocessed C-terminus of APP (C99 and C83) (see Fig. 8C). **(D)** Western blot to detect the APP C-terminus and AICD (see Fig. 8C) in HeLa cells. Treatment with DAPT for 12 or 24 h reduced AICD by ~80%, with a concomitant increase in the amount of uncleaved C99 or C83, consistent with inhibition of  $\gamma$ -secretase activity by the drug.

**Fig. S10**

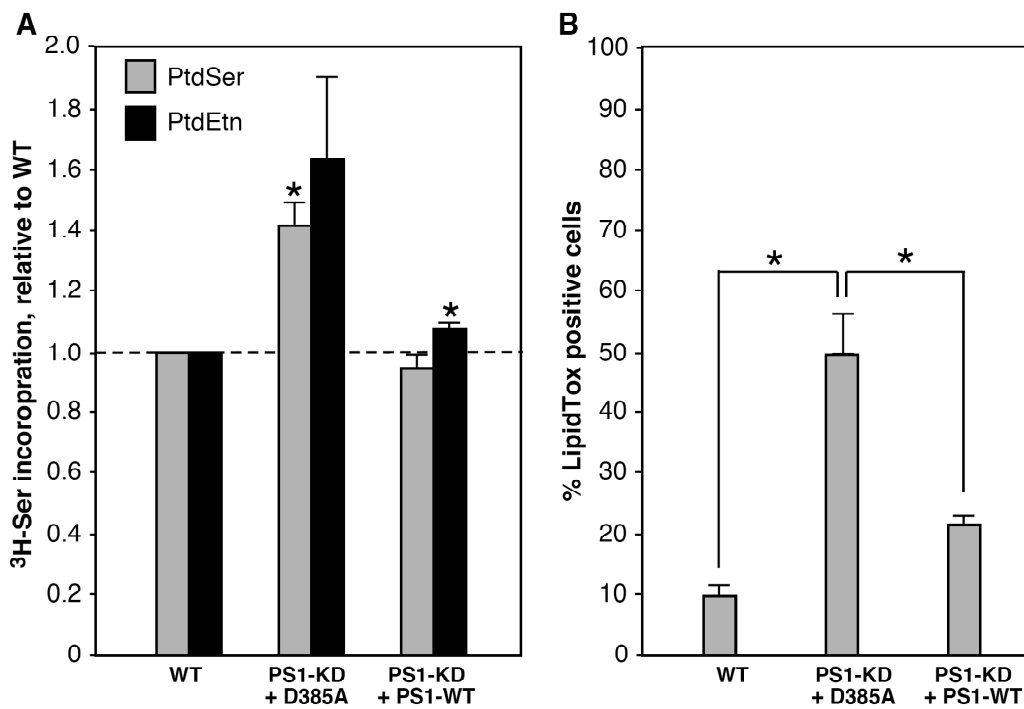

**Figure S10.** MAM function in HeLa cells in which PS1 had been knocked down (KD) by shRNA, and then subsequently transfected with either WT or "catalytically dead" PS1 (i.e. D385A mutation). **(A)** Phospholipid transport; data are averages ( $\pm$ SE) of  $^3\text{H}$ -Ser incorporation after 3 and 5 h. **(B)** Lipid droplet formation (average of 5 images ( $\sim$ 500 cells analyzed)  $\pm$ SE).
